# Supplementary material
Source: PubMed Central journal article supplement (PMC5800997)
Supplement: NIHMS925167-supplement-2.pdf [file NIHMS925167-supplement-2.pdf]

**Running speed**

|                         | control ( <i>n</i> = 4 animals) | DG lesion ( <i>n</i> = 10 animals) |
|-------------------------|---------------------------------|------------------------------------|
| arm end 1 (all periods) | 19.0 ± 1.3 cm/s                 | 20.3 ± 1.7 cm/s                    |
| arm end 1 (immobility)  | 6.3 ± 0.2 cm/s                  | 5.8 ± 0.2 cm/s                     |
| reward                  | 9.4 ± 0.3 cm/s                  | 10.3 ± 2.0 cm/s                    |
| arm end 2 (all periods) | 21.9 ± 2.3 cm/s                 | 20.7 ± 2.1 cm/s                    |
| arm end 2 (immobility)  | 5.2 ± 0.2 cm/s                  | 5.3 ± 0.2 cm/s                     |
| stem                    | 47.8 ± 1.5 cm/s                 | 44.6 ± 2.5 cm/s                    |
| arm                     | 48.0 ± 2.9 cm/s                 | 46.8 ± 2.7 cm/s                    |

**Total time in one trial**

|                         | control ( <i>n</i> = 4 animals) | DG lesion ( <i>n</i> = 10 animals) |
|-------------------------|---------------------------------|------------------------------------|
| arm end 1 (all periods) | 6.8 ± 2.0 s                     | 8.3 ± 0.9 s                        |
| arm end 1 (immobility)  | 0.8 ± 0.5 s                     | 0.9 ± 0.5 s                        |
| reward                  | 24.7 ± 2.3 s                    | 24.5 ± 2.8 s                       |
| arm end 2 (all periods) | 16.4 ± 1.3 s                    | 18.0 ± 1.8 s                       |
| arm end 2 (immobility)  | 3.6 ± 0.7 s                     | 4.2 ± 1.5 s                        |
| stem                    | 17.3 ± 1.1 s                    | 17.4 ± 0.5 s                       |
| arm                     | 18.2 ± 2.3 s                    | 20.1 ± 2.5 s                       |

**Supplementary Table 1 Neither the velocity profile nor the duration of any behavioral period differed between control and DG-lesioned animals.** (Top) Mean running speed in individual behavioral periods did not differ between control and DG-lesioned animals (arm end 1 (all running speeds),  $t(12) = 0.74$ ,  $P = 0.47$ ; arm end 1 (immobility only),  $t(12) = 1.28$ ,  $P = 0.22$ ; reward,  $t(12) = 1.21$ ,  $P = 0.24$ ; arm end 2 (all running speeds),  $t(12) = 0.10$ ,  $P = 0.92$ ; arm end 2 (immobility only),  $t(12) = 0.50$ ,  $P = 0.63$ ; stem,  $t(12) = 2.09$ ,  $P = 0.059$ ; arm,  $t(12) = 1.30$ ,  $P = 0.22$ ). (Bottom) Total time in any behavioral period did not differ between control and DG-lesioned animals (arm end 1 (all running speeds),  $t(12) = 0.85$ ,  $P = 0.41$ ; arm end 1 (immobility only),  $t(12) = 0.18$ ,  $P = 0.42$ ; reward,  $t(12) = 0.24$ ,  $P = 0.81$ ; arm end 2 (all running speeds),  $t(12) = 0.55$ ,  $P = 0.60$ ; arm end 2 (immobility only),  $t(12) = 0.25$ ,  $P = 0.80$ ; stem,  $t(12) = 0.09$ ,  $P = 0.93$ ; arm,  $t(12) = 0.47$ ,  $P = 0.65$ ).
